# Supplementary material for: Gene regulation of adult skeletogenesis in starfish and modifications during gene network co-option
Source: PubMed Central journal article supplement (PMC8505446; doi:10.1038/s41598-021-99521-4), 2021-10-11
Supplement: 41598_2021_99521_MOESM1_ESM.pdf [file 41598_2021_99521_MOESM1_ESM.pdf]

## Supplementary information

### Gene regulation of adult skeletogenesis in starfish and modifications during gene network co-option

**Authors:** Atsuko Yamazaki<sup>1\*</sup>, Shumpei Yamakawa<sup>2\*</sup>, Yoshiaki Morino<sup>1</sup>, Yasunori Sasakura<sup>3</sup>, Hiroshi Wada<sup>1</sup>

\*Equal contribution

#### **Affiliations:**

<sup>1</sup>Faculty of Life and Environmental Sciences, University of Tsukuba, Tsukuba, Ibaraki 305-8572, Japan

<sup>2</sup>Graduate School of Life and Environmental Sciences, University of Tsukuba, Tsukuba, Ibaraki, 305-8572, Japan

<sup>3</sup>Shimoda Marine Research Center, University of Tsukuba, Shimoda, Shizuoka, 415-0025, Japan

#### **Corresponding authors:**

Atsuko Yamazaki, Faculty of Life and Environmental Sciences, University of Tsukuba, Tennodai 1-1-1, Tsukuba, Ibaraki 305-8572, Japan. Email: [yama0205@gmail.com](mailto:yama0205@gmail.com)

Hiroshi Wada, Faculty of Life and Environmental Sciences, University of Tsukuba, Tennodai 1-1-1, Tsukuba, Ibaraki 305-8572, Japan. Email: [hwada@biol.tsukuba.ac.jp](mailto:hwada@biol.tsukuba.ac.jp)

## Supplementary information

**Figure S1.** Target sequences from larvae injected with transcription activator-like effector nuclease (TALEN) mRNAs.

| Target           | Left arm            | Right arm                        |                  |
|------------------|---------------------|----------------------------------|------------------|
|                  | TCCTTGGGCAGGGGCATT  | CGGCAGGGTAGTCAAAGCAGCTGCCTTTGGCA |                  |
| Control<br>(n=5) | TCCTTGGGCAGGGAGCATT | CGGCAGGGTAGTCAAAGCAGCTGCCTTTGGCA | 0 bp<br>(5/5)    |
|                  | TCCTTGGGCAGGGGCATT  | CGGCAGGGTAGTCAAAGCAGCTGCCTTTGGCA |                  |
|                  | TCCTTGGGCAGGGAGCATT | CGGCAGGGTAGTCAAAGCAGCTGCCTTTGGCA |                  |
|                  | TCCTTGGGCAGGGAGCATT | CGGCAGGGTAGTCAAAGCAGCTGCCTTTGGCA |                  |
| TALEN<br>(n=18)  | TCCTTGGGCAGGGAGCATT | CGGCAG-----TCAAAGCAGCTGCCTTTGGCA | -5 bp<br>(10/18) |
|                  | TCCTTGGGCAGGGAGCATT | CGGCAG-----TCAAAGCAGCTGCCTTTGGCA |                  |
|                  | TCCTTGGGCAGGGAGCATT | CGGCAG-----TCAAAGCAGCTGCCTTTGGCA |                  |
|                  | TCCTTGGGCAGGGAGCATT | CGGCAG-----TCAAAGCAGCTGCCTTTGGCA |                  |
|                  | TCCTTGGGCAGGGAGCATT | CGGCAG-----TCAAAGCAGCTGCCTTTGGCA |                  |
|                  | TCCTTGGGCAGGGAGCATT | CGGCAG-----TCAAAGCAGCTGCCTTTGGCA |                  |
|                  | TCCTTGGGCAGGGAGCATT | CGGCAG-----TCAAAGCAGCTGCCTTTGGCA |                  |
|                  | TCCTTGGGCAGGGAGCATT | CGGCAG-----TCAAAGCAGCTGCCTTTGGCA |                  |
|                  | TCCTTGGGCAGGGAGCATT | CGGCAG-----TCAAAGCAGCTGCCTTTGGCA |                  |
|                  | TCCTTGGGCAGGGAGCATT | CG-----GCAGCTGCCTTTGGCA          | -14 bp<br>(3/18) |
|                  | TCCTTGGGCAGGGAGCATT | CG-----GCAGCTGCCTTTGGCA          |                  |
|                  | TCCTTGGGCAGGGAGCATT | CG-----GCAGCTGCCTTTGGCA          |                  |
|                  | TCCTTGGGCAGGGAGCATT | CG-----AAAGCAGCTGCCTTTGGCA       | -12 bp<br>(3/18) |
|                  | TCCTTGGGCAGGGAGCATT | CG-----AAAGCAGCTGCCTTTGGCA       |                  |
|                  | TCCTTGGGCAGGGAGCATT | CG-----AAAGCAGCTGCCTTTGGCA       |                  |
|                  | TCCTTGGGCAGGGAGCAT  | -----GCCTTTGGCA                  | -23 bp           |
|                  | TCCTTGGGCAGGGAGCA   | -----GTCAAAGCAGCTGCCTTTGGCA      | -12 bp           |

Each sequence shows the target sequence of our designed TALEN and is from the control or TALEN mRNA-injected embryos. Target sequences included an 18-bp left-arm binding site, a 16-bp spacer region and a 17-bp right-arm binding site (the left and right binding sites are highlighted in orange). No insertions or deletions were found in genomes from control embryos (0 bp, 5/5), while various deletions were detected in genomes from TALEN mRNA-injected embryos (-5 bp, 10/18; -14 bp, 3/18; -12 bp, 4/18; and -23 bp, 1/18). Such deletions were detected in left/right arm binding sites and spacer regions. Single base mismatch was found at the left binding site of the clone from the control embryos (indicated by the orange letter "A" in the top sequence). This substitution was considered an endogenous polymorphism of the starfish.

**Figure S2. Molecular phylogenetic tree of Ets-family genes for identification of *erg* gene.**

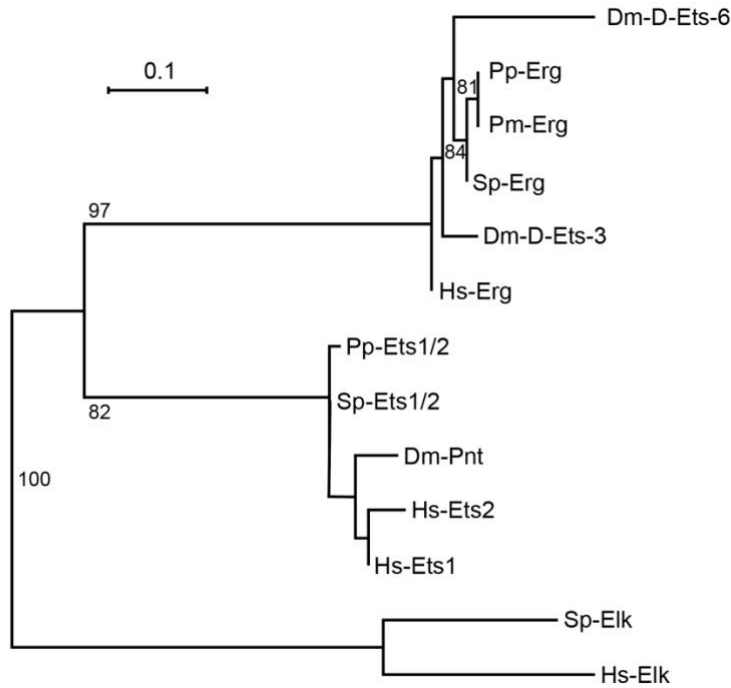

The numbers at the nodes are the bootstrap values (only those  $\geq 50\%$  are shown), obtained by 1000 replicates. Tree was constructed based on the amino acid sequences of the Ets domain using the maximum likelihood (ML) method. The amino acid substitution model was LG + G + F. Accession numbers are as follows: Dm-D-Ets-6, NP\_001285547.1; Pm-erg, ADA79646.1; Sp-erg, NP\_999833.1; Dm-D-Ets-3, NP\_729142.1; Hs-Erg, NP\_001317954.1; Pp-Ets1/2, BAJ33504.1; Sp-Ets1/2, NP\_999698.1; Dm-Pnt, NP\_524461.2; Hs-Ets2, NP\_001243224.1; Hs-Ets1, NP\_001155894.1; Sp-Elk, NP\_999792.1; Hs-Elk, AAH48296.1. Abbreviations: Hs, *Homo sapiens*; Dm, *Drosophila melanogaster*; Sp, *Strongylocentrotus purpuratus*; Pp, *Patiria pectinifera*; Pm, *Patiria miniata*.

## Supplementary data

### The Sequences for *Pp-erg* and *Pp-clect*

Underlines indicate for sequences that correspond to primers. The sequences of *Pp-erg* and *Pp-clect* were obtained from PCR amplification using cDNA and transcriptomic data, respectively.

#### >*Pp-erg*

AGATCATCAGGATGAAGCAGGAGCCGGACCACGGAAGTCACGGCCACGAGGCCGGTAGCCTCGGCG  
GGCGGGTGGTGGAAAGCCGAGTCCCCGTTGGACTGCAGCGTGACCAAGAGGCAACCCACGGGGCTAT  
GACGGAGGCCACCCAGGCGGCACCCCCTTACCCGTGCCCGCCTTACCCCGGATCGGAATCGGACCGTG  
CTCGCTACCCCCGCCAATGTCACAACCAACGAGAAACGGGTCAATTGTGCCTGCTGACCCCAACATGT  
GGACGATCGACCACGTGCAGCAGTGGGTACAGTGGGCGGTGAGGGAGTACTCCCTGCAGGACGTGCT  
GGTCAGTCGGTTCGGCATTGACGGCAAACAGCTCTGCAAGATGACCCGCGAGGACTTCACGCGACTGA  
CCAGCTCTACAACGCCGACGTGCTCCTCTCCCATCTCAACTTCTCAAGCAAGCCCCACTGCCAAACCT  
GACATCAGACGACGTAGACAAAGCTCTCAGCCTTCCCCAGGGCTCCGCCTAGCTCACAAGCAACGAA  
CATTGGAACGGCTCAGCCCATCACCGAGAAGAAATACACGTGCAATGCTACAAATTACTACCCGGATCA  
GATGCAAAAAGCAAGTGCCAGTGC GTTCCCGTACCCAGTCAGCTCCCACGTGGACACAAATTCCCGGA  
TGCAACGAACAGAGCCTTCGTGCGCTGAGTCGCTGGTGC GCGGCAGGCAAACAGCTGGGCCTCGTCT  
GTGCCTGTGCTCCTCAAAGGATTTACACAGACGACGACGTCAATTCCCAAGGCTGGCATCGAATCC  
TCATCCCAGATCAGACCAGATCCGTATCAAGTCTTCGGTCCCACCAGCAGAACGCTTGCAAATCCAGAA  
AACCCAGCAAGCAGCTTAGGAGGACATGTCTGGAACCGGAGTGGTCAGATCCAGCTGTGGCAGTTCCT  
ACTGGAGCTCCTGTCCGACAGCTCCAACGCCAACTGCATCACGTGGGAGGGCACCAACGGGGAGTTCA  
AGATGACCGACCCGGACGAGGTGGCCCGCCGCTGGGGCGAGCGCAAGAGCAAACCCAACATGAACTA  
CGACAAGCTCAGCCGGGCCCTGCGTACTACTACGACAAGAACATTATGACCAAGGTCCACGGCAAGC  
GCTACGCCTACAAGTTCGACTTCGCGGGGCTGGCCAGGCCATGCAGCCGGTGCAGGCCGACCCACAGC  
GTCTACCGTTACCAGTCGGACTTGAGCTACCTGGCCAGGGCTATCACCACCCAGCAAGATCAACTTT  
GTGGGCACGCCATCCCCTCCACCAACGCCGGCCTCTCAGCTCGCACGGATCCTATTGGTCGTCGCCC  
AGCGCCGCAATATCTACCCGAGCAGTCACGTGACCCATCCGCACAGTCACGTGTCACCGCACATAGGC  
ACGTATTACGGGTAGACTGTGACGATGCCGTTGTTGTTTTGACTGATAAAAGTGCCATGGTTTAAGAA  
AAACTCGAATACCGATGGTTAAAAAAAACGTAACGAACCTACTCCAGCCTGTTTTAAACGGCATC  
TTCAACAACCAGGATTAAGGTAGCCGCCGAGGTACCTTGTGGTTATTTTAATCGTGAACTGA

#### >*Pp-clect*

CTCTCCGATCTCAAACAGTAAGGTCACCGTGTGGTAACTAGGACAGTATGTTGGCTTGACTTGTTA  
GTTGGTCAGTCAGTGGTTGGTTGTTGGTAGGAGTAAGTCAGTCTTGTAGGCCAAGTAAATAAGCAG  
TTCACTTGTTTTGTTGGTCGGTCAGTAATTCGTTTGGTTCAGTTGGTTGACCTGTAAGTTGGTTGGTT

AGTAAACCGCTGAGGGCGCATCAGACGGTTTGCAGTCGGTCATTTTATAGTTGGCCAGTATGCGGTGT  
TCAGTAGATAGCCTCAAAGCATTTTTGTTGTTGGTTAGTTGCTTGGCTGTAGGTTGATATGTTTGCCAT  
TGCAATACCAACCACCCAACAACCATCCAACCTGAATAGCTGAACTATACAGCGAATACCAAAAATAAGG  
AGGCCGTCTCCCTCTAGAAAAGTGAACATTTTGAGAAAAAATAATTTGGCTAAAATTACATTGTCATA  
TTGACTAAAATATCCTGAAGGACAATTAACAACAGCTGATGTGGCAGCCTGAGTGTCTATGTAAACAG  
GAGGTATCTCTTTATACGGGCCTCAATTATTTTCTTAACTTCAAATTAGTTCTTATCCTATGAGTCCCCG  
TTTTCTGTTGTGAAGCTGGACAAGGGACTTGGCTCCGAACAACTGCATAATGCATGATTGACTCATC  
CCTGTTGCATATGCAAATAAATGGGCGGGTCGAAAAGTTTACCGCGCATGG GCACACGAGTTCGCGA  
TGCTGTAGACTAGGTTTGATCATTTTTGTTTGGCTTTTATAGTCGACCTGCATTCGAGGTGCAGCTCGCC  
TGAGACACAGATCGACACCCAGGTTGAGGAACAGACCCCCAGCCGTTCAAATGCAGTTTTTCTCCCT  
TGCTTGTGGTTCTACTGGTCGCCGGCCTGGCCACGGCCCAACGGCTCAACAACCTGCCCCGACGATGTGG  
TCCGGCGCCGGCGAATACTGCTACCAGTCTTCAAGCAGCCTCTGCCCTGGCAGGAAGCGAGCAACTC  
TGCTCCAAGTTCTCCTCCTGCGCCACGGGAGCGGGCCAGCCTGCTGAAGCTCGACTCACCCCAGGCC  
GACACGCGGCTGGAGAAATCCTGAGTCCAAAAGGCAACCCCAGCCCTCCAACACGTGGATCGGCTT  
GGGCGATCCCATGAACACGGGTCAGCTCACCTGGCCTGACGGTACCACCACACAGAGCGTAGGCTACA  
ACAACCTCGGGCAGGGAGGCCGGAACGGAACTGCGCTCTGAAGGACACCCGCACGAACCAGTGGAC  
CTTCGCGCCCTGCACGCAAGCGAACTCCTTCGTCTGTCAGATGCAGCGGAGCGCCCCTCTGCAGACCGG  
CGGCCCAGGCACCAATTTCCCTTCACGACCTGTCTAAAAGTCGGCTCGGACGAACAATTTACGAACAA  
TTTGTGCAGCGAACAAGAGGAATTCGTACAAAACTGAACAACCCAATCGGGATCCAAGATGGCCGTA  
CGAGAAGTAGCACCAAGTATAGTCCCTGCCCCAGTCTACCAACATCCAGCGTGTTCATCCAGTATA  
GGTCGAGTACCGGCGATGACCATCAAAAAGTATTTGCTCCACTCTGTAAAACCTTCTTCTGGTACAAACA  
TTCATCGCTATCTTGTGAAGCTTTCTTCAGATGTGAGCAATAATTGAACTACAGAAAAAATGACAGCA  
TTCACTGAACAGTCGGACACGAATTTATCGAATAGTAACGCATTTTATCGAATATGTTATCTCATTTTGT  
GTTAGTTTGTGTTAGCACTTCTTTGACAAT AATGTTGGCAACGGGATTTTCAAGAAACGAATAAAGGAG  
AATCAGTGGTCCATGAAATAAAAAAAGATCGGAAGAGCAC
